# Supplementary material for: Pore size is a critical parameter for obtaining sustained protein release from electrochemically synthesized mesoporous silicon microparticles
Source: PeerJ. 2015 Oct 6;3:e1277. doi: 10.7717/peerj.1277 (PMC4636406; doi:10.7717/peerj.1277)
Supplement: Supplemental Information 2 — Excel data sheet. N2 adsorbed volume (cm3/g) vs. the pressure/saturation pressure ratio for Samples A, B, C. This data was used to prepare Fig. 1D and the calculations for Table 1. [file peerj-03-1277-s004.xlsx]

## Sheet: Hoja1
Sample A		Sample B		Sample C
P/P0	Adsorbed volume (cc/g)	P/P0	Adsorbed Volume (cc/g)	P/P0	Adsorbed Volume (cc/g)
0.0611	44.158	0.0642	35.8654	0.0592	78.9914
0.0765	46.2674	0.0765	38.559	0.0817	84.5685
0.0997	48.9571	0.0998	42.7637	0.0995	88.3024
0.1198	51.0155	0.1198	45.8299	0.1195	92.0235
0.1401	52.8924	0.1396	48.6175	0.1397	95.4583
0.1601	54.6342	0.1596	51.2497	0.1599	98.6837
0.1992	57.7967	0.1988	56.0655	0.1979	104.314
0.2521	61.7862	0.2495	61.9979	0.2529	111.958
0.3038	65.5615	0.2999	67.8881	0.3061	119.249
0.3555	69.3552	0.3495	73.8776	0.3494	125.252
0.4462	76.3765	0.4444	86.2913	0.4485	139.616
0.5481	85.4558	0.5473	102.702	0.5473	155.574
0.6469	96.7267	0.6458	124.507	0.6469	174.52
0.735	111.407	0.7471	163.558	0.7439	200.807
0.7956	128.244	0.797	201.961	0.7959	224.707
0.8358	148.53	0.8363	255.856	0.839	255.301
0.8692	179.046	0.8732	332.626	0.8718	292.235
0.9003	234.413	0.9113	410.948	0.9048	330.76
0.9244	301.225	0.9277	431.56	0.9226	344.79
0.9397	344.563	0.9347	437.144	0.9386	352.112
0.9479	362.841	0.9505	444.942	0.9477	354.627
0.9583	379.635	0.963	447.164	0.9615	356.707
0.9719	390.559	0.9861	449.66	0.9842	358.266
0.984	394.667	1	454.884	0.997	360.438
0.9958	397.901	0.9607	447.91	0.9773	358.26
0.978	395.16	0.936	446.13	0.9604	357.426
0.9624	393.608	0.9089	443.747	0.9369	356.447
0.9422	390.769	0.9043	443.115	0.9253	355.944
0.939	389.998	0.8794	436.364	0.9054	354.833
0.9275	384.904	0.8367	404.837	0.881	351.458
0.9105	368.592	0.8048	362.879	0.8461	340.647
0.88	314.4	0.7187	260.096	0.803	317.66
0.8364	225.668	0.6518	186.596	0.7414	262.969
0.7954	167.654	0.5451	110.579	0.6383	192.552
0.737	124.668	0.4499	86.289	0.5467	163.757
0.6509	100.553	0.3509	72.8432	0.4514	143.017
0.5444	87.0309	0.2367	59.1975	0.3454	124.886
0.4378	75.7125	0.1429	47.6039	0.2397	110.294
0.3502	68.5434			0.1337	94.6131
0.2544	61.3985
0.1439	52.5112
