# Supplementary material for: Pore size is a critical parameter for obtaining sustained protein release from electrochemically synthesized mesoporous silicon microparticles
Source: PeerJ. 2015 Oct 6;3:e1277. doi: 10.7717/peerj.1277 (PMC4636406; doi:10.7717/peerj.1277)
Supplement: Supplemental Information 4 — Excel data sheet. Percentage of BMP7 released over time at 37 °C in PBS buffer for Sample C (0.1 µg per mg of microparticle was considered 100%). Data points for each replicate. Time was expressed in days. [file peerj-03-1277-s006.xlsx]

## Sheet: Prototype C - Tabla 1-1
	Time (days)	Release (%) S1	Release (%) S2	Release (%) S3
	28	56.79	69.24	69.45
	14	61.79	55.38	62.93
	7	39.21	43.32	41.49
	5	32.88	36.14	38.92
	1	11.2	9.22	11.08
	0.3	3.58	4.54	4.42
